# Supplementary material for: HIV reservoir quantification by five-target multiplex droplet digital PCR
Source: PubMed Central journal article supplement (PMC8517383; doi:10.1016/j.xpro.2021.100885), 2021-10-11
Supplement: mmc1.pdf [file mmc1.pdf]

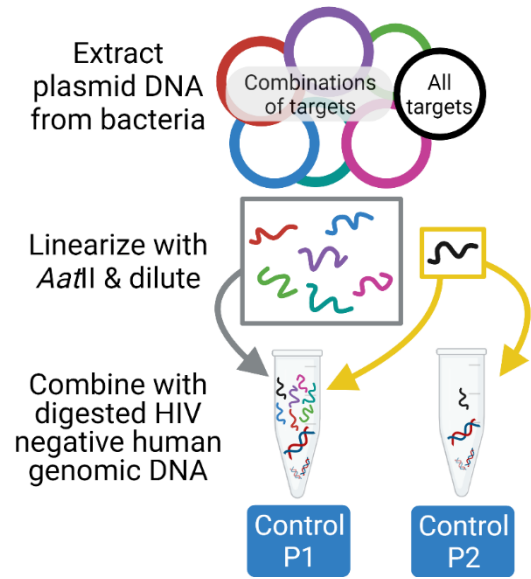

Figure S1: Graphical representation of controls preparation, related to section “Prepare Plasmid Controls”, step 8.
